# Supplementary material for: Functional annotation of the Hippo pathway somatic mutations in human cancers
Source: Springer Nature journal article supplement (doi:10.1038/s41467-024-54480-y), 2024-11-21

Supplementary Figure 1

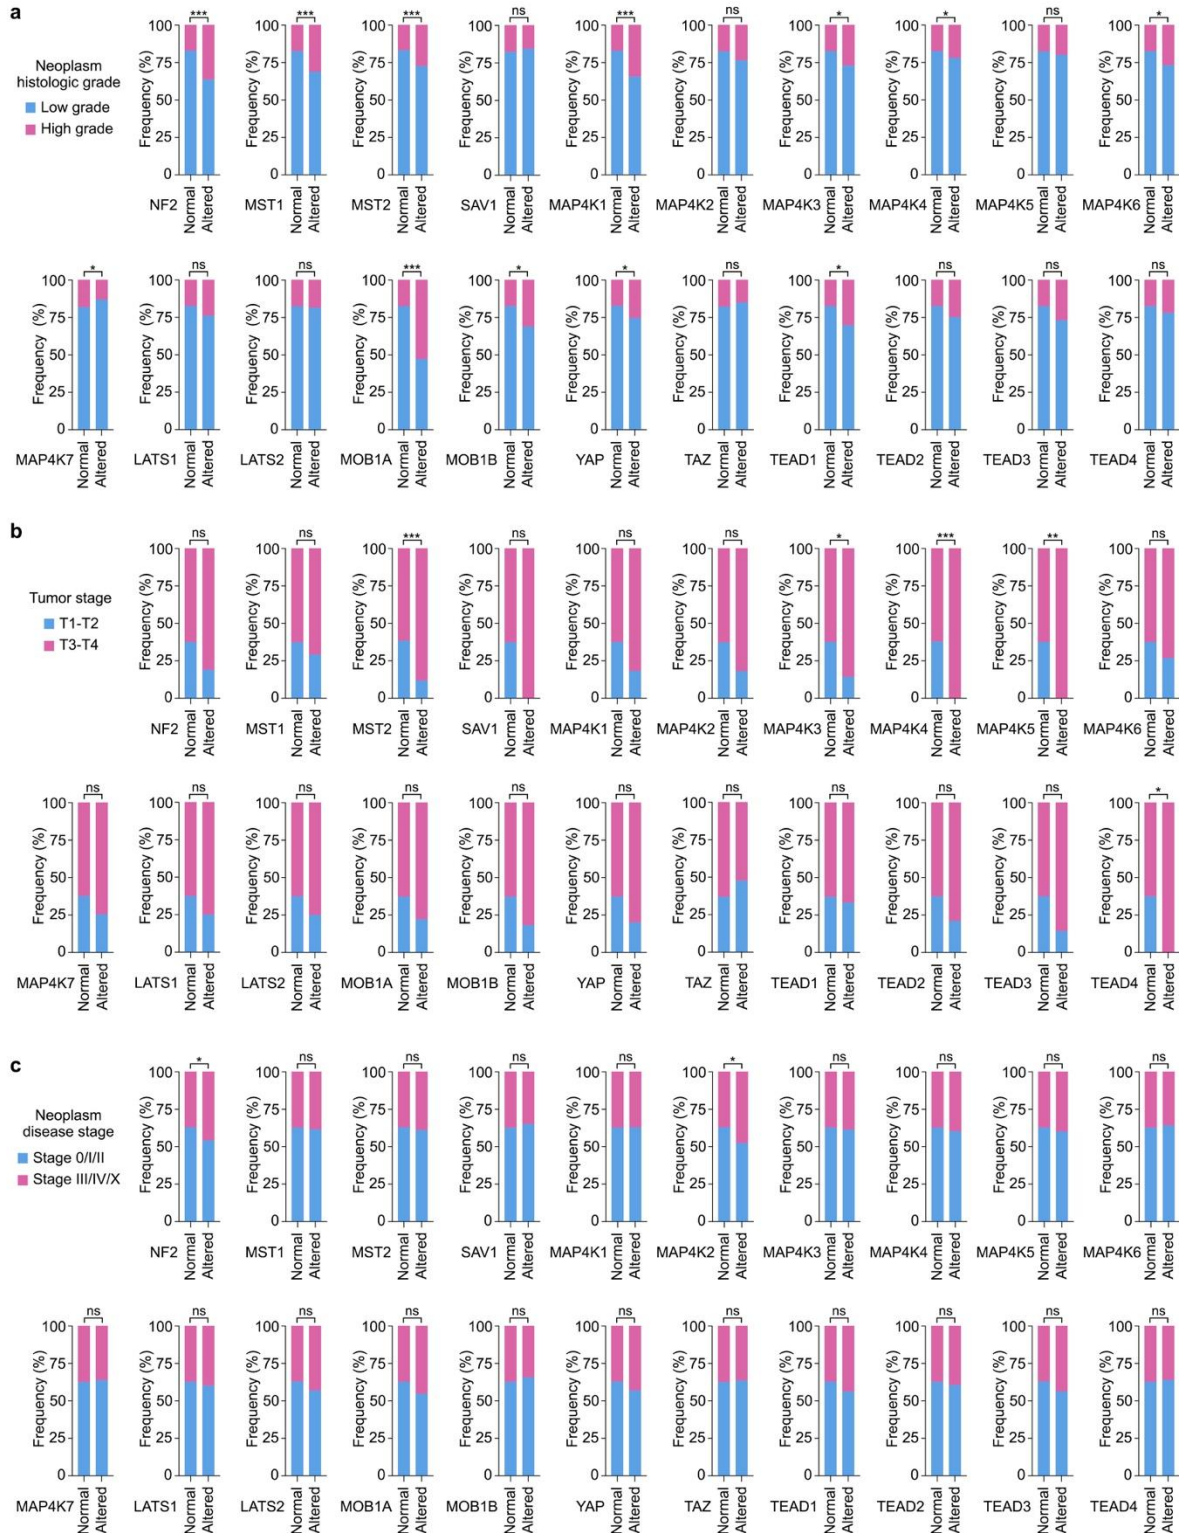

**Supplementary Figure 1. Histological analysis of cancer patient samples with individual altered Hippo signaling genes.**

**(a-c)** Tumor samples with normal and altered Hippo signaling genes are analyzed for their neoplasm histologic grade **(a)**, tumor stage **(b)**, and neoplasm disease stage **(c)**. ns, no significance. \*  $p < 0.05$ , \*\*  $p < 0.01$ , \*\*\*  $p < 0.001$  (Chi-squared test). Source data are provided as a Source Data file.

Supplementary Figure 2

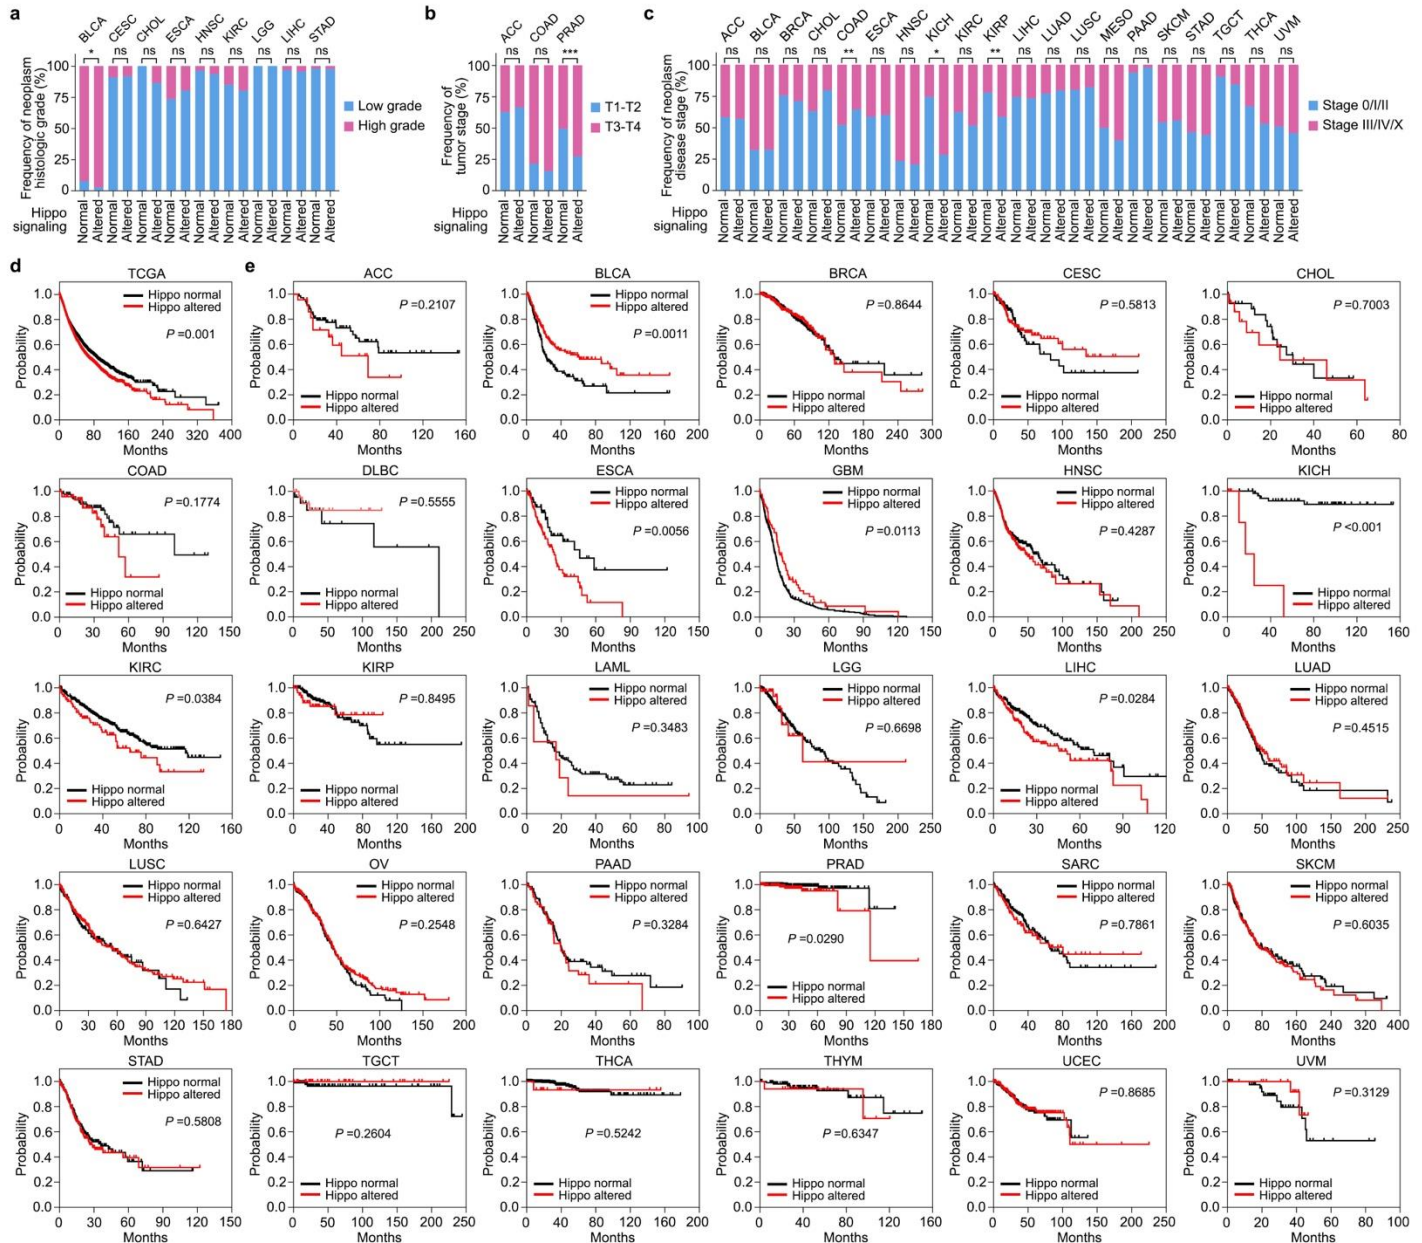

**Supplementary Figure 2. Histological and survival analyses of cancer patients with altered Hippo signaling genes in different cancer types.**

**(a-c)** Tumor samples with normal and altered Hippo signaling genes are analyzed for their neoplasm histologic grade **(a)**, tumor stage **(b)**, and neoplasm disease stage **(c)** in different cancer types. ns, no significance. \*  $p < 0.05$ , \*\*  $p < 0.01$ , \*\*\*  $p < 0.001$  (Chi-squared test).

**(d-e)** Overall survival analysis of cancer patients with normal and altered Hippo signaling genes. The overall survival of cancer patients with normal and altered Hippo signaling genes in TCGA **(d)** and the indicated cancer types **(e)** was analyzed using log-rank (Mantel-Cox) test.

Source data are provided as a Source Data file.

Supplementary Figure 3

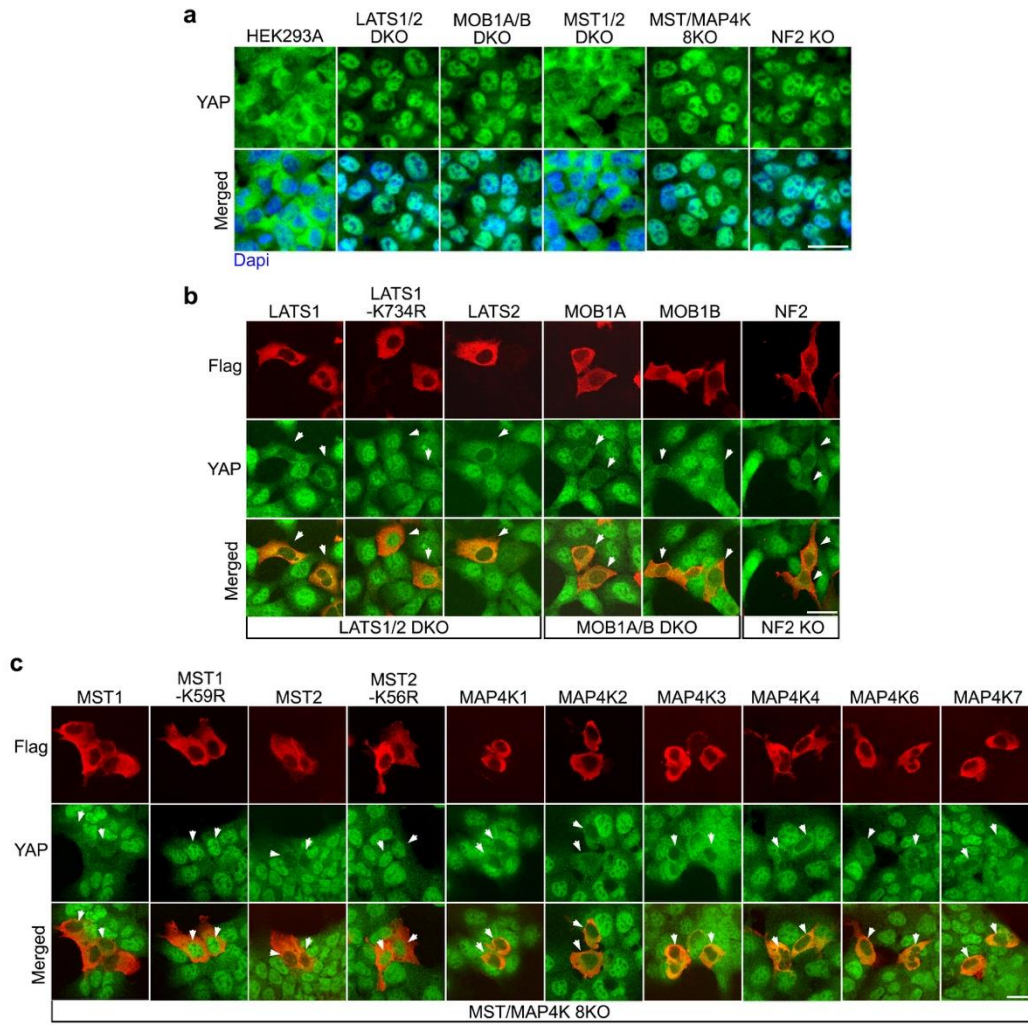

**Supplementary Figure 3. Validation of Hippo pathway gene knockout (KO) cells for missense mutation screen.**

**(a)** YAP is enriched the nucleus of the LATS1/2 double KO (DKO), MOB1A/B DKO, MST/MAP4K-8KO, and NF2 KO HEK293A cells. The indicated Hippo component KO HEK293A cells were subjected to immunofluorescent staining. Nucleus was visualized by Dapi. Scale bar, 20  $\mu$ m.

**(b-c)** Validation of the Hippo component KO HEK293A cells. The indicated LATS1/2 DKO **(b)**, MOB1A/B DKO **(b)**, NF2 KO **(b)**, and MST/MAP4K-8KO **(c)** HEK293A cells were transfected with the indicated constructs and subjected to immunofluorescent staining. Scale bar, 30  $\mu$ m. Arrows showed the cells expressing the indicated constructs.



Supplementary Figure 4

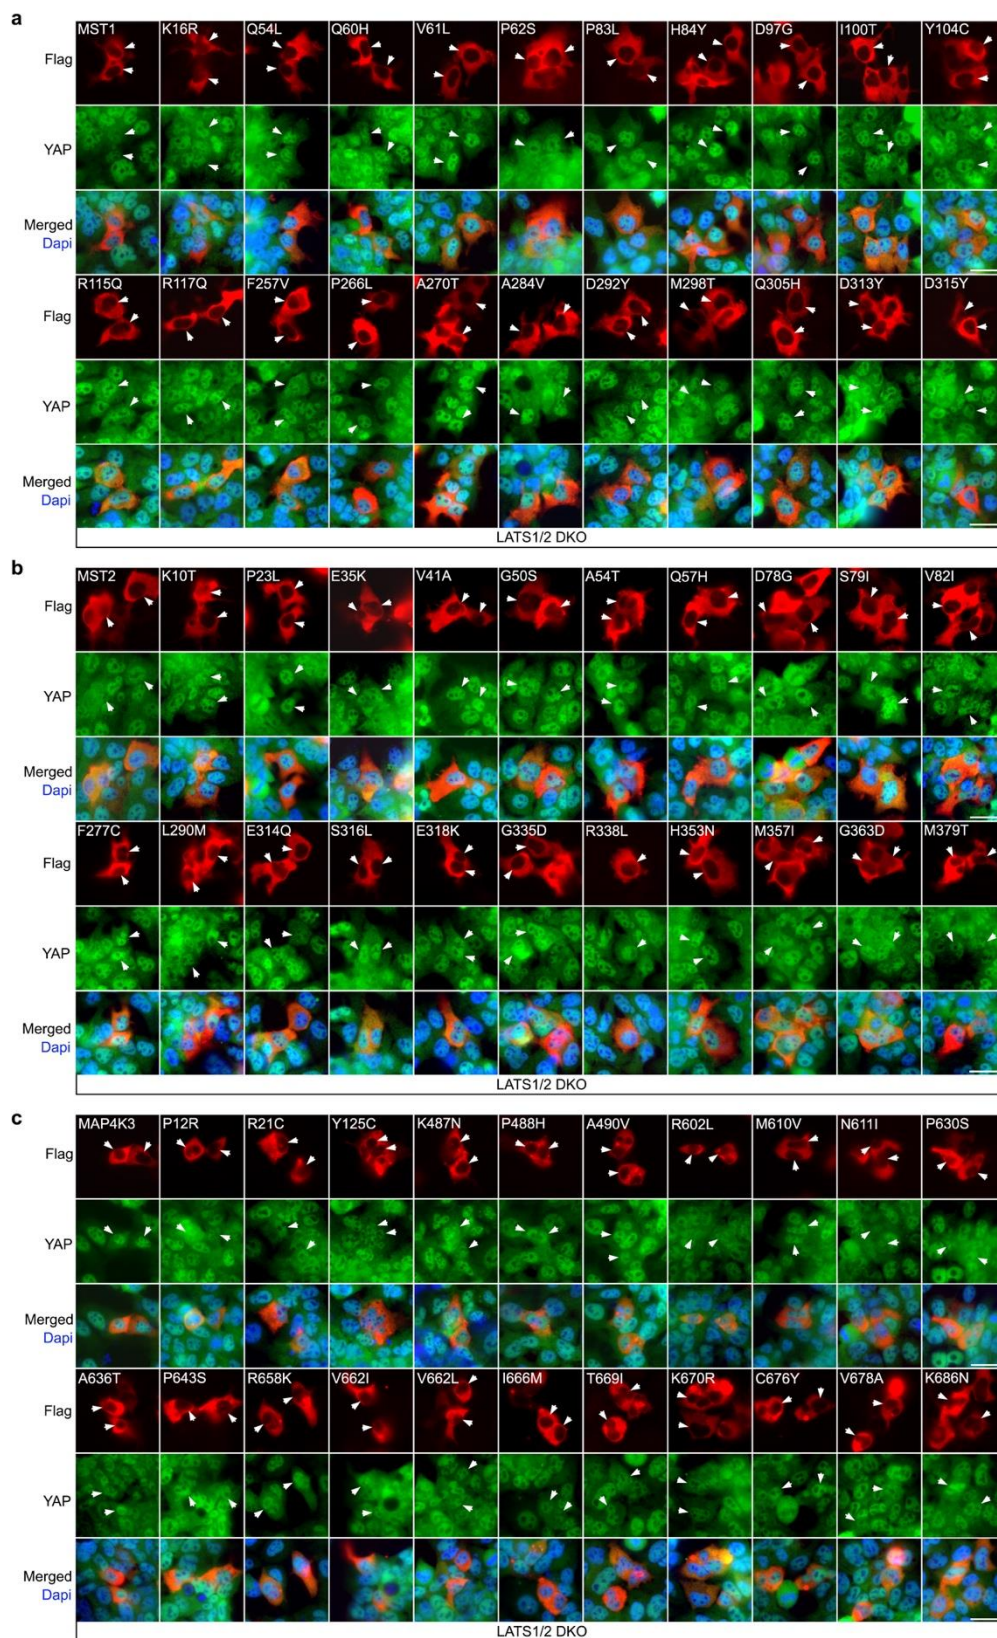

**Supplementary Figure 4. Characterization of the neutral mutations of MST1, MST2 and MAP4K3 in the LATS1/2 DKO cells.**

(a-c) The LATS1/2 DKO HEK293A cells were transfected with the indicated neutral missense mutants of MST1 (a), MST2 (b), and MAP4K3 (c) and subjected to immunofluorescent staining.

Scale bar, 30  $\mu$ m. Arrows showed the cells expressing the indicated constructs.



Supplementary Figure 5

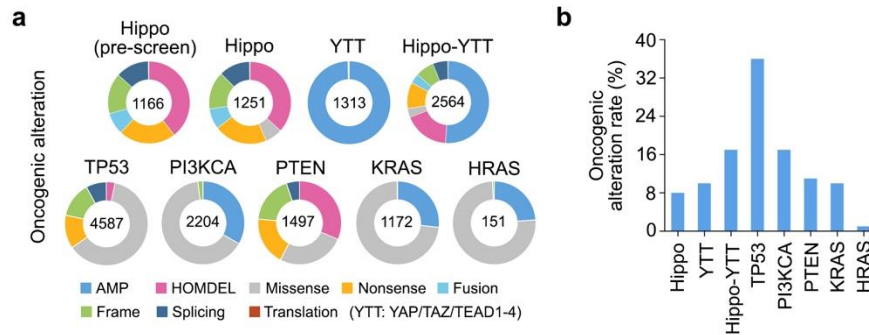

**Supplementary Figure 5. Analysis of the Hippo signaling oncogenic alterations.**

(a) The oncogenic alterations of Hippo signaling genes and the indicated tumor suppressor genes and oncogenes were summarized. The number of affected cancer patients was indicated.

(b) The oncogenic alteration rates for Hippo signaling genes and the indicated cancer-related genes were shown.

Source data are provided as a Source Data file.

Supplementary Figure 6

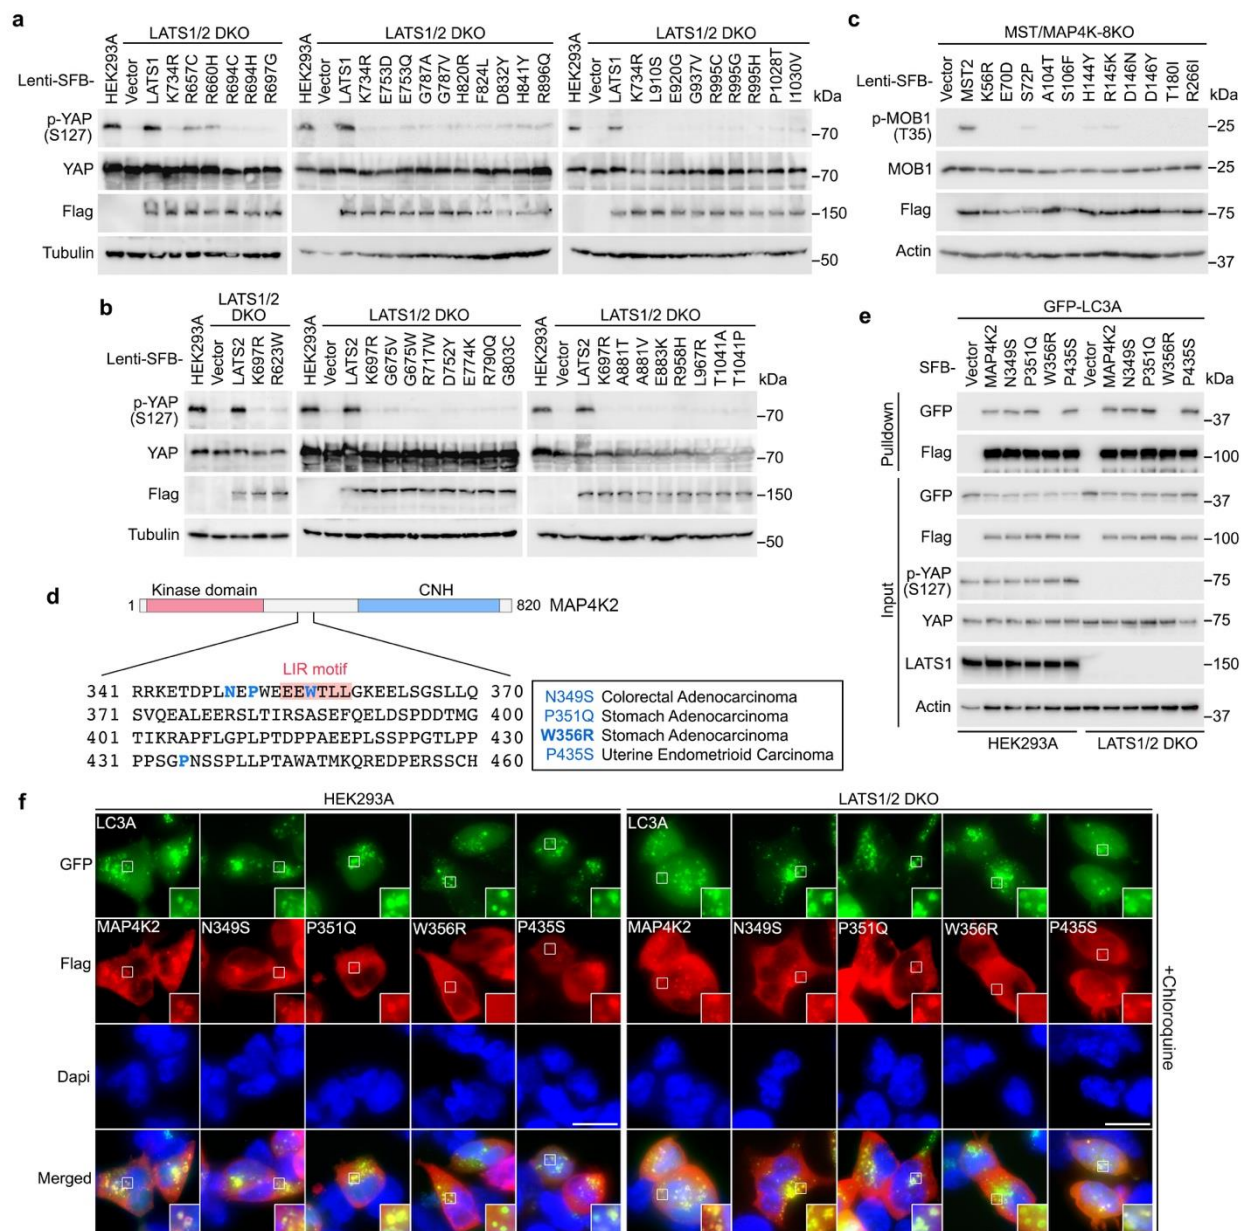

**Supplementary Figure 6. Characterization of the Hippo LOF and neutral missense mutations.**

**(a-b)** Analysis of LATS1/2 LOF missense mutations in stable cells. The LATS1/2 DKO HEK293A cells stably expressing the indicated LOF mutants of LATS1 **(a)** and LATS2 **(b)** were subjected to Western blot. A representative blot of two independent experiments is shown.

**(c)** Analysis of MST2 LOF missense mutations in stable cells. The MST/MAP4K-8KO HEK293A cells stably expressing the indicated MST2 LOF mutants were subjected to Western blot. A representative blot of two independent experiments is shown.

**(d)** The MAP4K2 neutral mutation W356R is identified in its LIR motif. W356R and its nearby neutral mutations were indicated in blue. The LIR motif was highlighted in red.

**(e)** The W356R neutral mutation disrupted the interaction of MAP4K2 with LC3A in both wild-type and LATS1/2 DKO HEK293A cells. Wild-type and LATS1/2 DKO HEK293A cells were transfected with GFP-LC3A and the indicated SFB-MAP4K2 constructs and subjected to pulldown assay using S protein beads. A representative blot of two independent experiments is shown.

**(f)** The W356R neutral mutation disrupted the co-localization of MAP4K2 with LC3A in chloroquine-treated wild-type and LATS1/2 DKO HEK293A cells. The constructs encoding GFP-LC3A and the indicated SFB-MAP4K2 mutants were co-expressed in wild-type and LATS1/2 DKO HEK293A cells, treated with chloroquine (200  $\mu$ M) for 4 hours, and subjected to immunofluorescent staining. The indicated regions in the box are shown 3 times enlarged. Scale bar, 20  $\mu$ m.

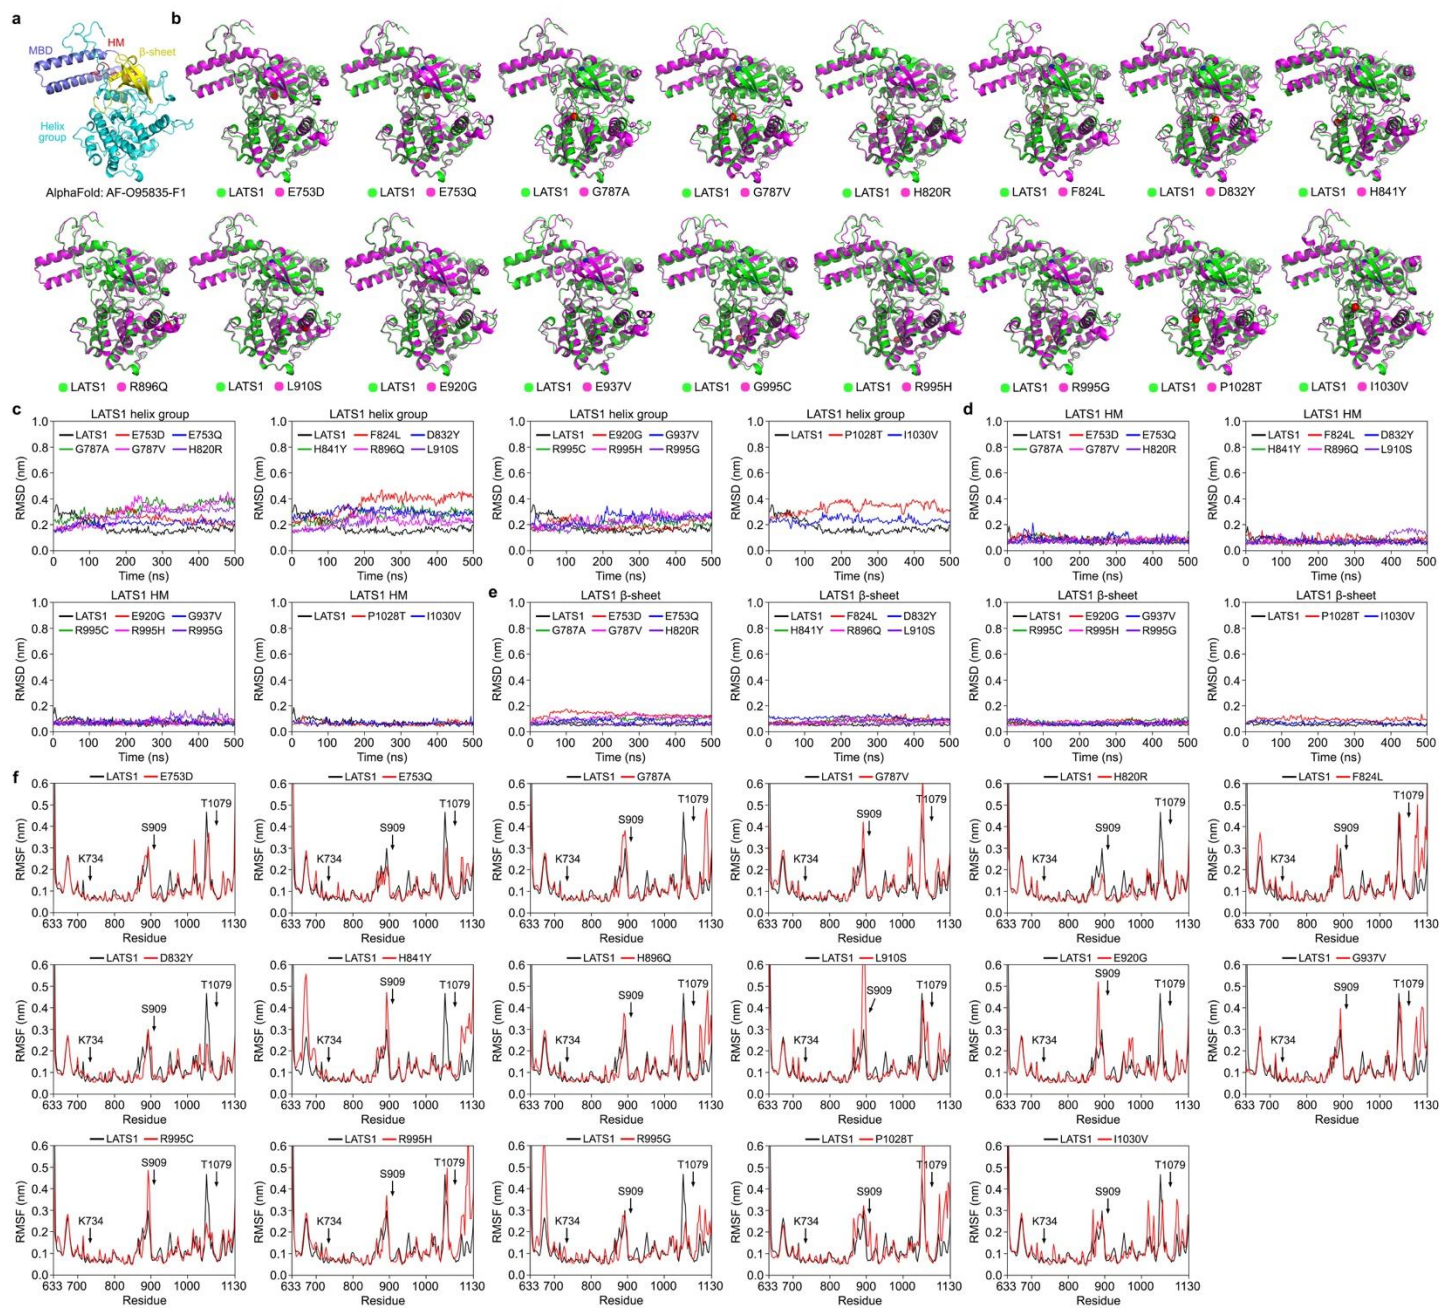

**Supplementary Figure 7. Molecular dynamics analysis of the LATS1 LOF missense mutations.**

(a) The LATS1 protein structure including its MOB1-binding domain (MBD) and kinase domain (predicted using AlphaFold2) is used for the molecular dynamics analysis. The MBD, helix group, hydrophobic motif (HM), and  $\beta$ -sheet were shown in different colors.

(b) The LATS1 LOF missense mutations induce its protein conformational change. The overlay structures were shown for LATS1 and its indicated LOF missense mutants.

(c-e) RMSD analysis is performed to examine the LATS1 LOF missense mutations-caused effects on its kinase domain structure, where LATS1 helix group (c), HM (d), and  $\beta$ -sheet (e) were examined.

(f) RMSF analysis is performed for the LATS1 kinase domain LOF missense mutants. LATS1 ATP-binding site K734, autophosphorylation site S909, and HM phosphorylation site T1079 were indicated.



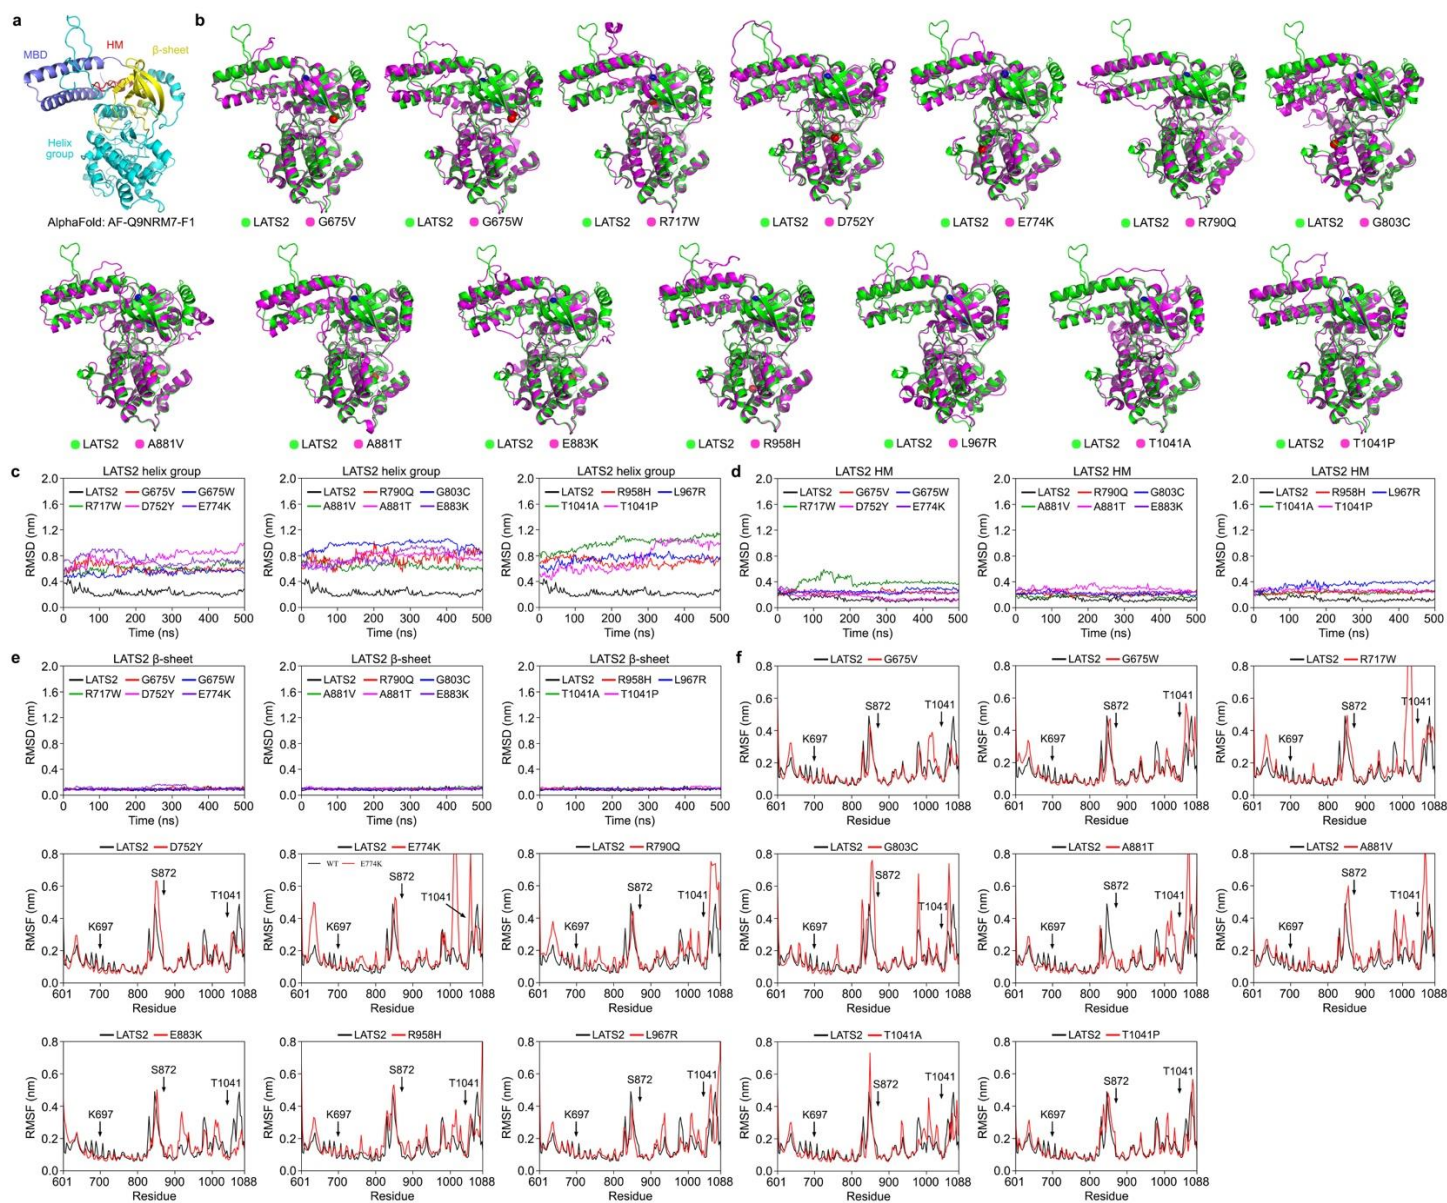

**Supplementary Figure 8. Molecular dynamics analysis of the LATS2 LOF missense mutations.**

(a) The LATS2 protein structure including its MOB1-binding domain (MBD) and kinase domain (predicted using AlphaFold2) is used for the molecular dynamics analysis. The MBD, helix group, hydrophobic motif (HM), and  $\beta$ -sheet were shown in different colors.

(b) The LATS2 LOF missense mutations induce its protein conformational change. The overlay structures were shown for LATS2 and its indicated LOF missense mutants.

(c-e) RMSD analysis is performed to examine the LATS2 LOF missense mutations-caused effects on its kinase domain protein structure, where LATS2 helix group (c), HM (d), and  $\beta$ -sheet (e) were examined.

(f) RMSF analysis is performed for the LATS2 kinase domain LOF missense mutants. LATS2 ATP-binding site K697, autophosphorylation site S872, and HM phosphorylation site T1041 were indicated.

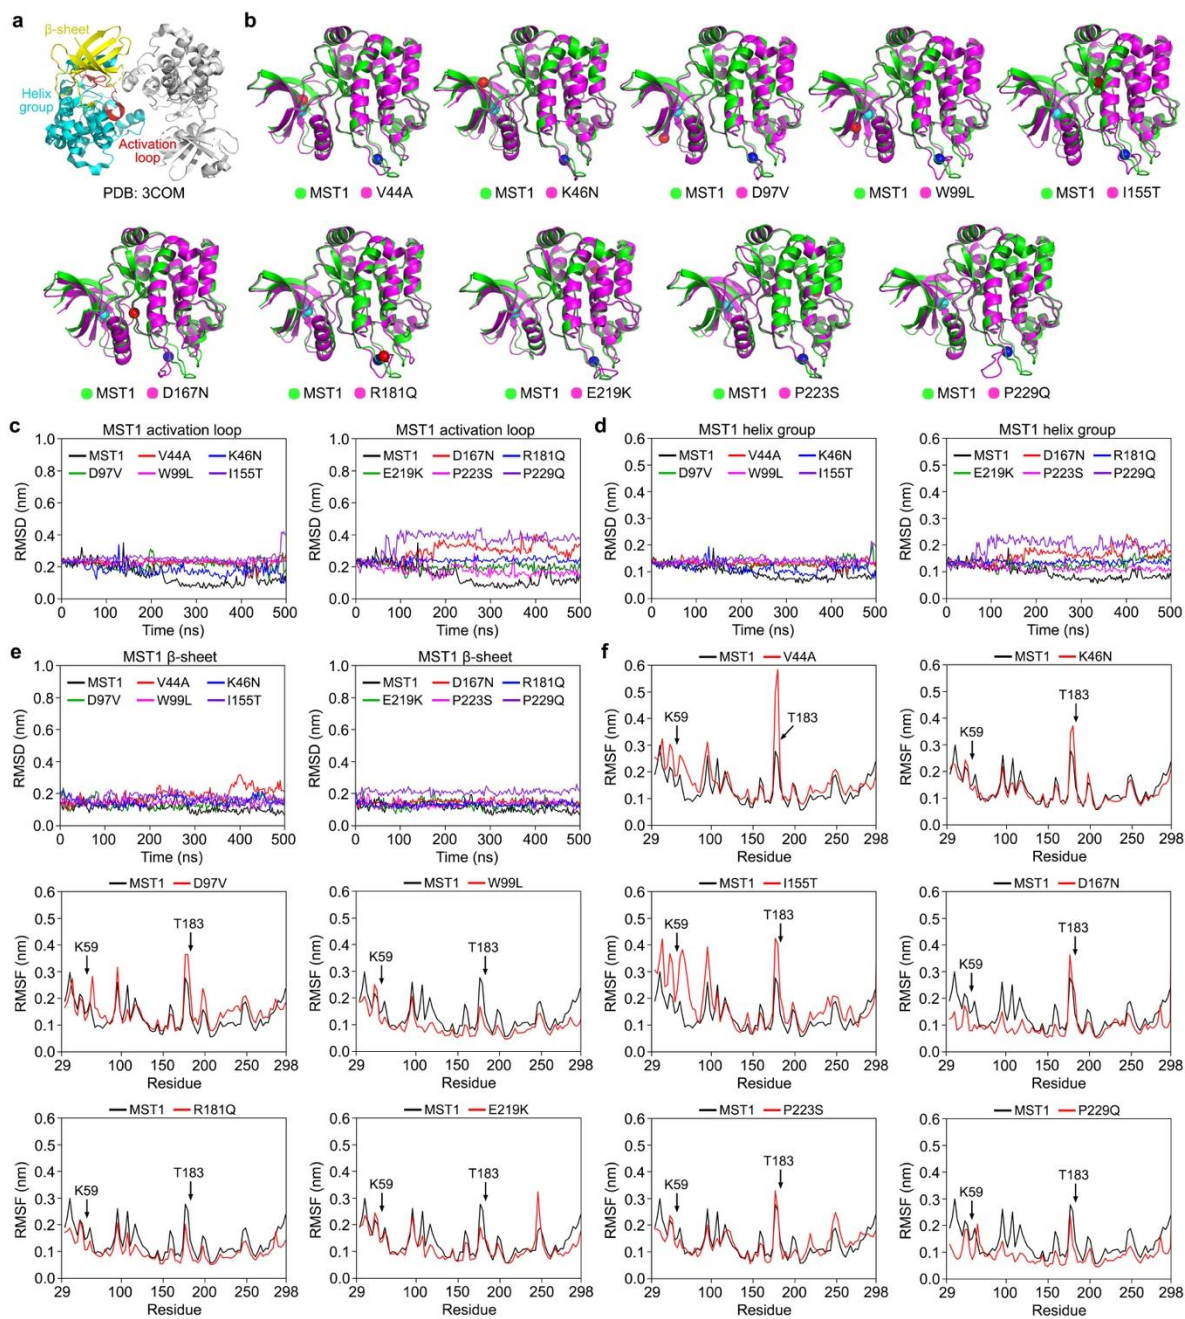

**Supplementary Figure 9. Molecular dynamics analysis of the MST1 LOF missense mutations.**

(a) The MST1 kinase domain protein structure (PDB: 3COM) is used for the molecular dynamics analysis. The activation loop, helix group, and  $\beta$ -sheet were shown in different colors.

(b) The MST1 LOF missense mutations induce its kinase domain conformational change. The kinase domain overlay structures were shown for MST1 and its LOF missense mutants.

(c-e) RMSD analysis is performed to examine the MST1 LOF missense mutations-caused effects on its kinase domain protein structure, where MST1 kinase domain activation loop (c), helix group (d), and  $\beta$ -sheet (e) were examined.

(f) RMSF analysis is performed for the MST1 kinase domain LOF missense mutants. MST1 ATP-binding site K59 and autophosphorylation site T183 were indicated.



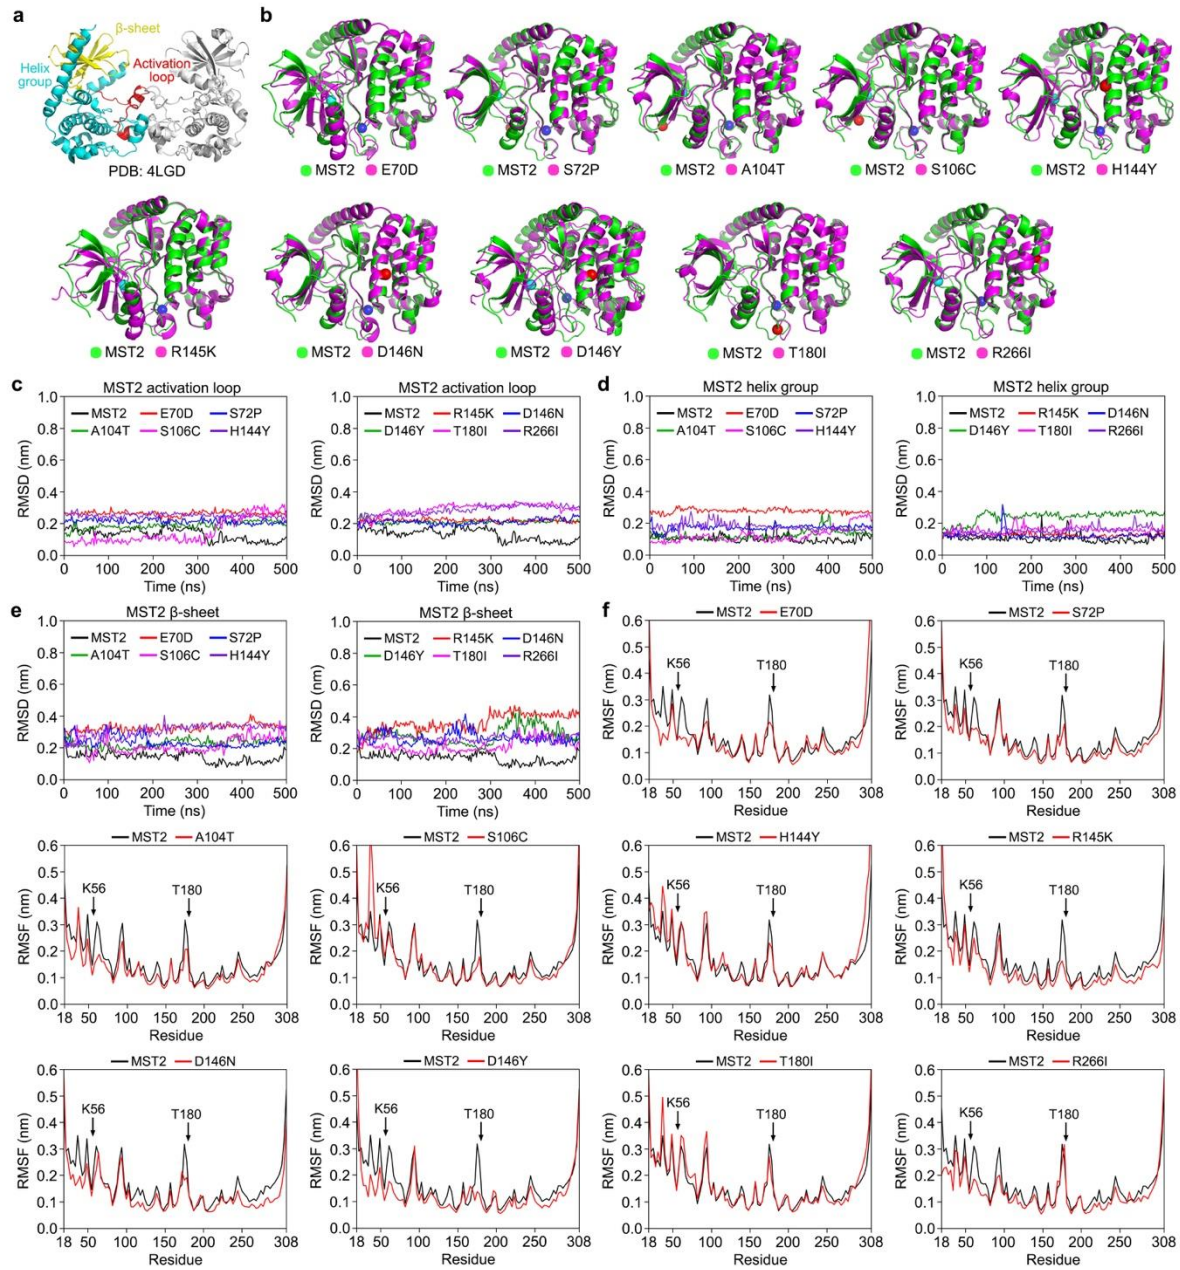



**Supplementary Figure 10. Molecular dynamics analysis of the MST2 LOF missense mutations.**

(a) The MST2 kinase domain protein structure (PDB: 4LGD) is used for the molecular dynamics analysis. The activation loop, helix group, and  $\beta$ -sheet were shown in different colors.

(b) The MST2 LOF missense mutations induce its kinase domain conformational change. The kinase domain overlay structures were shown for MST2 and its indicated LOF missense mutants.

(c-e) RMSD analysis is performed to examine the MST2 LOF missense mutations-caused effects on its kinase domain protein structure, where MST2 kinase domain activation loop (c), helix group (d), and  $\beta$ -sheet (e) were examined.

(f) RMSF analysis is performed for the MST2 kinase domain LOF missense mutants. MST2 ATP-binding site K56 and autophosphorylation site T180 were indicated.

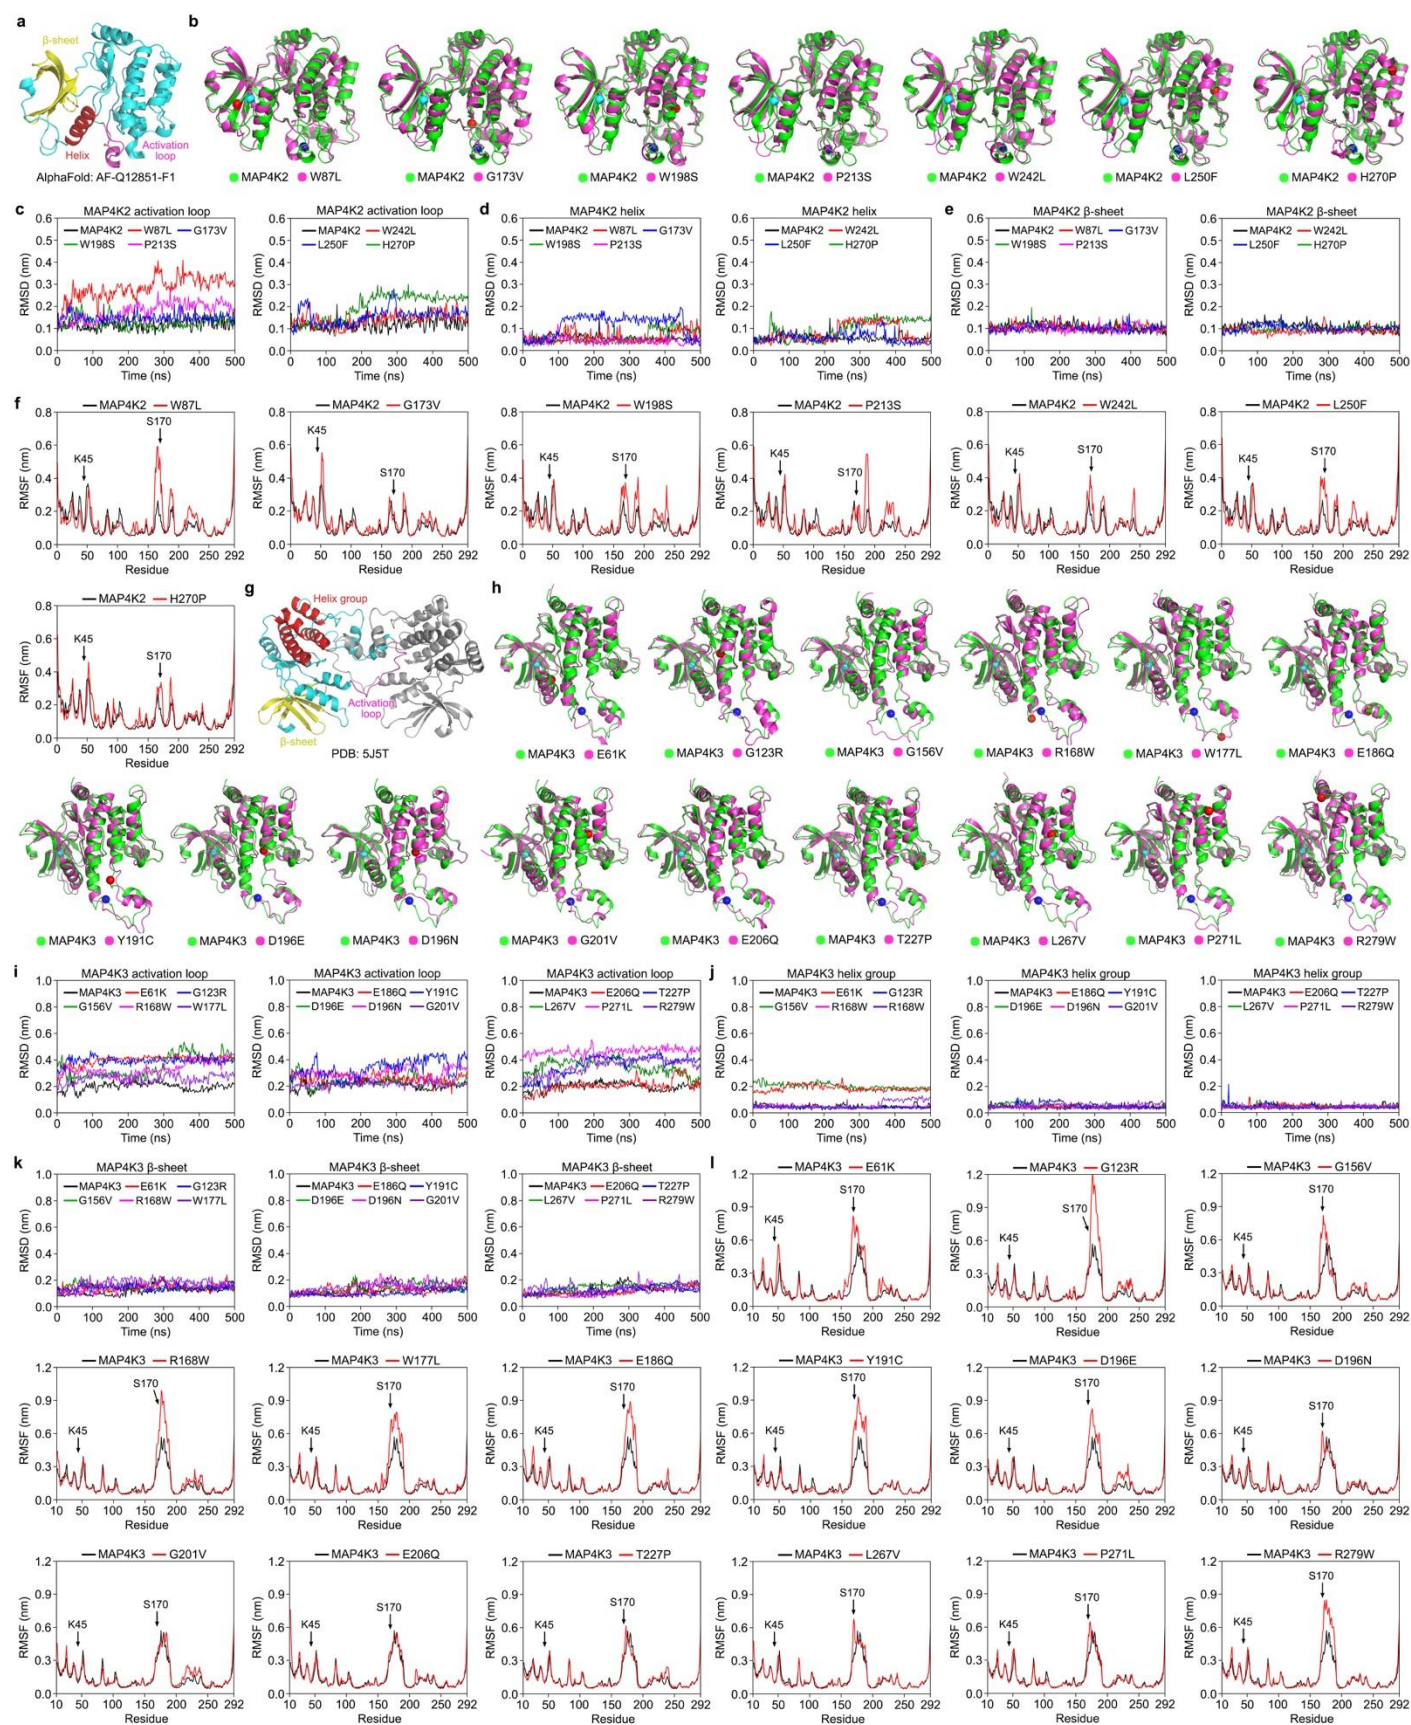

**Supplementary Figure 11. Molecular dynamics analysis of the MAP4K2/3 LOF missense mutations.**

(a) The MAP4K2 kinase domain protein structure (predicted using AlphaFold2) is used for the molecular dynamics analysis. The activation loop, helix region, and  $\beta$ -sheet were shown in different colors.

(b) The MAP4K2 LOF missense mutations induce its kinase domain conformational change. The kinase domain overlay structures were shown for MAP4K2 and its indicated LOF missense mutants.

(c-e) RMSD analysis is performed to examine the MAP4K2 LOF missense mutations-caused effects on its kinase domain protein structure, where MAP4K2 kinase domain activation loop (c), helix group (d), and  $\beta$ -sheet (e) were examined.

(f) RMSF analysis is performed for the MAP4K2 kinase domain LOF missense mutants. MAP4K2 ATP-binding site K45 and autophosphorylation site S170 were indicated.

(g) The MAP4K3 kinase domain protein structure (PDB: 5J5T) is used for the molecular dynamics analysis. The activation loop, helix group, and  $\beta$ -sheet were shown in different colors.

(h) The MAP4K3 LOF missense mutations induce its kinase domain conformational change. The kinase domain overlay structures were shown for MAP4K3 and its indicated LOF missense mutants.

(i-k) RMSD analysis is performed to examine the MAP4K3 LOF missense mutations-caused effects on its kinase domain protein structure, where MAP4K3 kinase domain activation loop (i), helix group (j), and  $\beta$ -sheet (k) were examined.

(l) RMSF analysis is performed for the MAP4K3 kinase domain LOF missense mutants. MAP4K3 ATP-binding site K45 and autophosphorylation site S170 were indicated.

Supplementary Figure 12

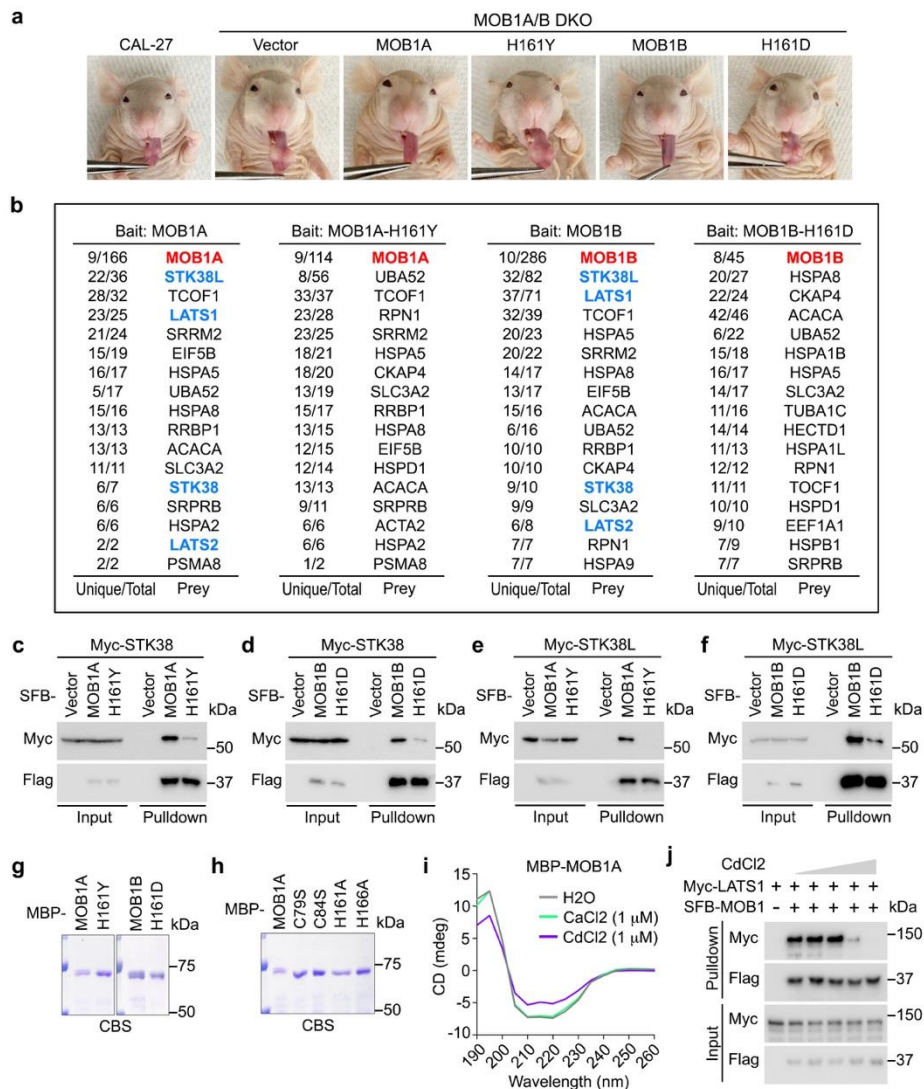

**Supplementary Figure 12. The MOB1A/B LOF missense mutations interfere with MOB1A/B ZNF domains and protein functions.**

(a) The MOB1A/B LOF missense mutants promote CAL-27 xenograft tumor growth in mouse tongues. The representative images of mice and their tongues were shown.

(b) TAP-MS analysis of the protein-protein interaction network of MOB1A/B and their LOF missense mutants. The numbers of unique and total peptides for each identified protein were shown.

(c-f) The MOB1A/B LOF missense mutations disrupt the interaction of MOB1A/B with STK38 and STK38L. HEK293T cells were transfected with Myc-STK38/L and the indicated SFB-MOB1A/B constructs and subjected to pulldown assay using S protein beads. A representative blot of two independent experiments is shown.

(g-h) The indicated MBP-tagged MOB1A/B proteins are purified from bacteria and visualized by Coomassie blue staining (CBS).

(i) MOB1A protein structure is changed upon Cd treatment. The MBP-tagged MOB1A protein was incubated with 1  $\mu$ M CaCl<sub>2</sub> or CdCl<sub>2</sub> and subjected to circular dichroism analysis.

(j) Cd treatment targets the MOB1-LATS1 complex formation. HEK293T cells were transfected with Myc-LATS1 and SFB-MOB1A constructs. Cell lysates were incubated with CdCl<sub>2</sub> at different concentrations (i.e., 0  $\mu$ M, 1  $\mu$ M, 2.5  $\mu$ M, 5  $\mu$ M, and 10  $\mu$ M) and subjected to pulldown assay. A representative blot of two independent experiments is shown.

Source data are provided as a Source Data file.



Supplementary Figure 13

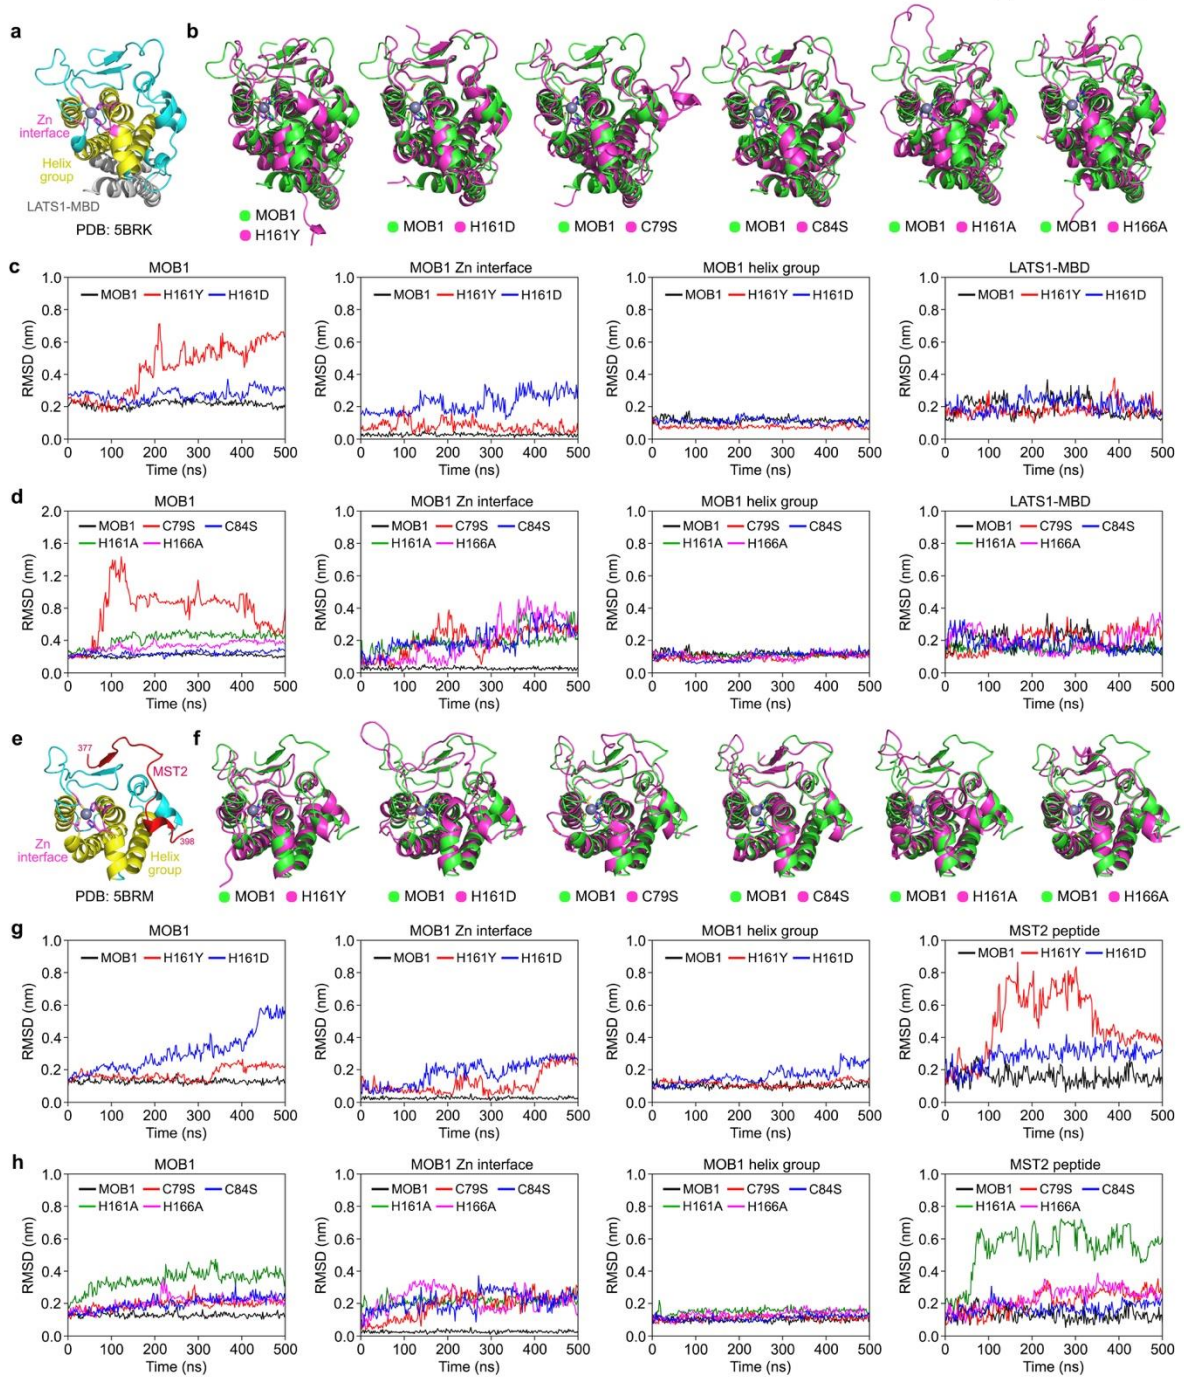

**Supplementary Figure 13. Molecular dynamics analysis of the MOB1 LOF missense mutations.**

(a) The p-MOB1/LATS1-MBD co-crystal structure (PDB: 5BRK) is used for the molecular dynamics analysis. The Zn interface and helix group of MOB1 and LATS1-MBD were shown in different colors.

(b) The MOB1 LOF and ZNF domain mutations induce the conformational change of the p-MOB1/LATS1-MBD complex. The p-MOB1/LATS1-MBD overlay structures were shown for MOB1 and its indicated LOF and ZNF domain mutants.

(c-d) RMSD analysis is performed to examine the MOB1 LOF missense mutations (c) and its ZNF domain mutations (d)-caused effects on the p-MOB1/LATS1-MBD co-crystal structure. RMSD analysis was performed for overall MOB1, its Zn interface and helix group, and LATS1-MBD within the p-MOB1/LATS1-MBD co-crystal structure.

(e) The MOB1/MST2-peptide co-crystal structure (PDB: 5BRM) is used for the molecular dynamics analysis. The Zn interface and helix group of MOB1 and MST2-peptide were shown in different colors.

(f) The MOB1 LOF and ZNF domain mutations induce the conformational change of the MOB1/MST2-peptide complex. The MOB1/MST2-peptide overlay structures were shown for MOB1 and its indicated LOF and ZNF domain mutants.

(g-h) RMSD analysis is performed to examine the MOB1 LOF missense mutations (g) and its ZNF domain mutations (h)-caused effects on the MOB1/MST2-peptide co-crystal structure. RMSD analysis was performed for overall MOB1, its Zn interface and helix group, and MST2-peptide within the MOB1/MST2-peptide co-crystal structure.

Supplementary Figure 14

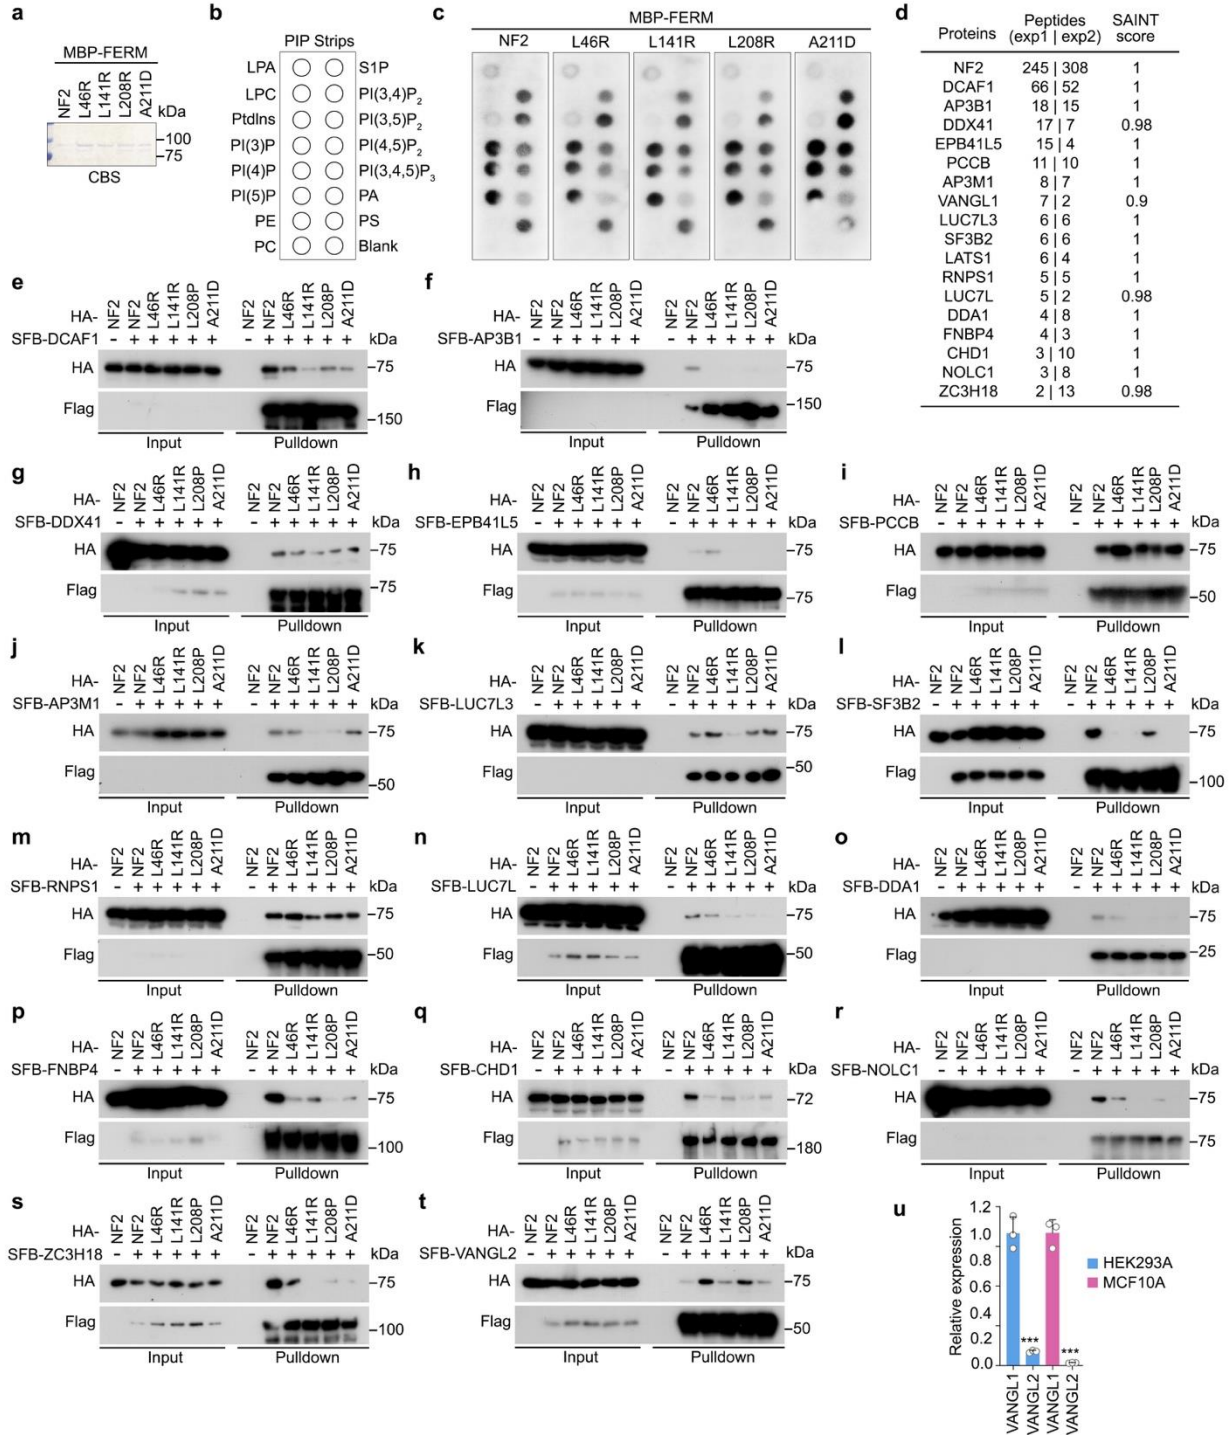

**Supplementary Figure 14. The NF2 LOF mutations do not affect NF2 lipid-binding ability but promote its interaction with VANGL proteins.**

(a) The indicated MBP-tagged NF2 FERM proteins are purified from bacteria and visualized by Coomassie blue staining (CBS).

(b) Illustration of the PIP Strips membrane used for the protein-lipid interaction study.

(c) The NF2 LOF mutations do not affect the interaction of NF2 FERM domain with the phospholipids. The PIP Strips membranes were incubated with the bacterially purified MBP-tagged NF2 FERM domain mutant proteins and subjected to Western blot. A representative blot of two independent experiments is shown.

(d) Summary of the NF2 HCIPs identified through two biologically repeated TAP-MS analyses. The total peptide number and SAINT score for each HCIP were shown.

(e-s) Characterization of the NF2 LOF mutations-caused effects on the interaction of NF2 with its HCIPs. HEK293T cells were transfected with HA-NF2 LOF mutants and the indicated SFB-tagged HCIPs and subjected to pulldown assay using S protein beads. A representative blot of two independent experiments is shown.

(t) The NF2 LOF mutations promote its interaction with VANGL2. HEK293T cells were transfected with HA-NF2 LOF mutants and SFB-VANGL2 and subjected to pulldown assay. A representative blot of two independent experiments is shown.

(u) *VANGL2* is lowly expressed in HEK293A and MCF10A cells as compared to *VANGL1*. The transcription of *VANGL1* and *VANGL2* was examined by q-PCR (mean  $\pm$  s.d., n = 3 biological replicates). \*\*\*  $p < 0.001$  (two-tailed Student's *t*-test).

Source data are provided as a Source Data file.



Uncropped scans of all blots and gels

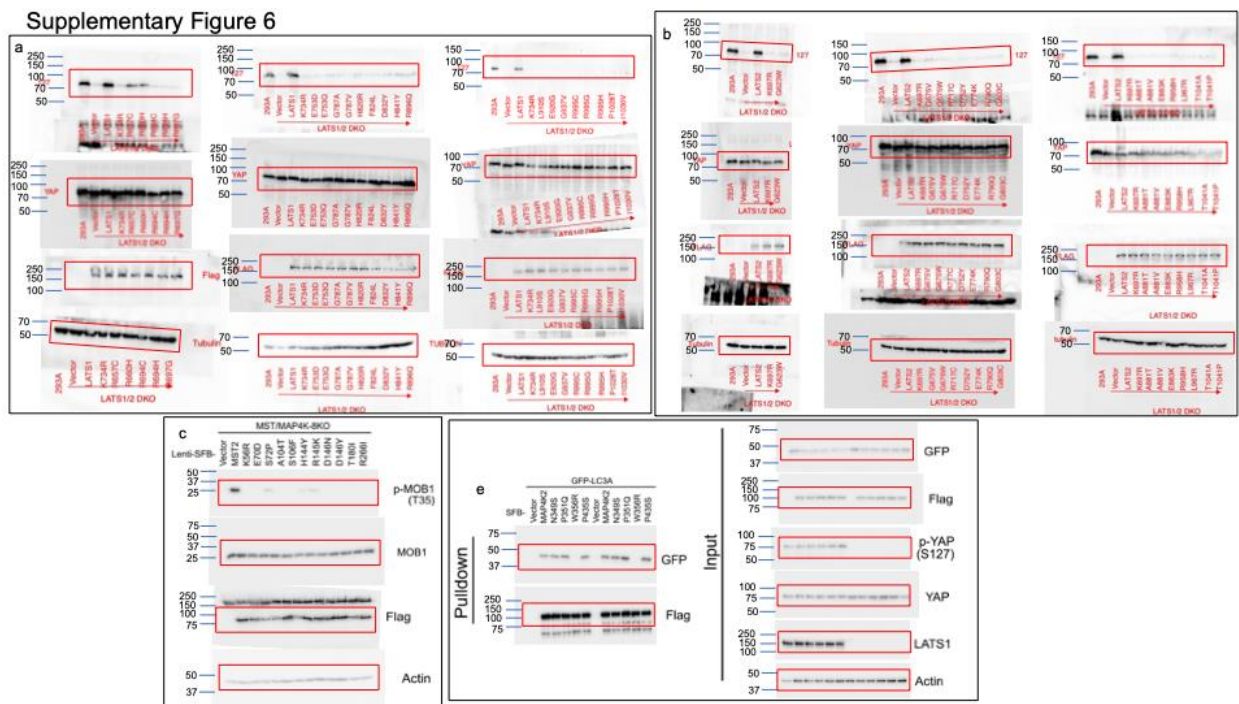



Supplementary Figure 14

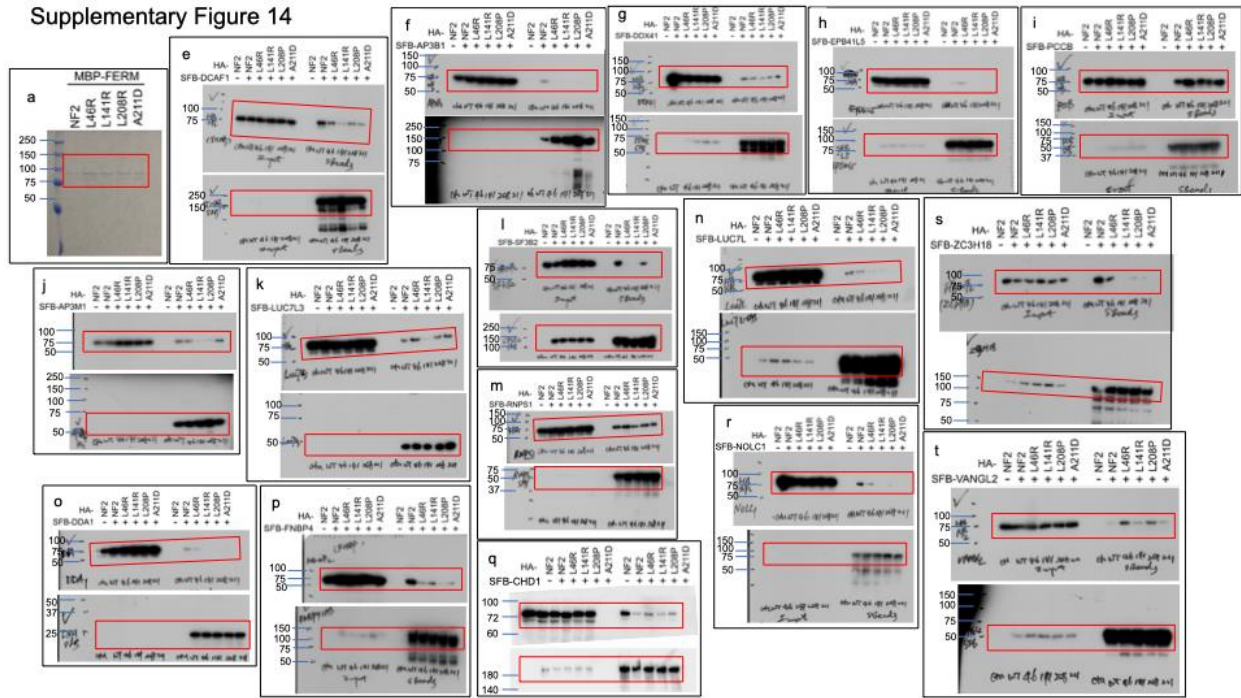

Supplement: MOESM1 [file 41467_2024_54480_MOESM1_ESM.pdf]
